# Supplementary material
Source: MDPI journal article supplement (https://www.mdpi.com/2410-3888/8/5/219)
Supplement: s1 [file s1]

Archive with 1 entries (1 files):
- fishes-2322922-supplementary.pdf
